# Supplementary material for: Bipolar resistive switching characteristics in LaTiO3 nanosheets
Source: Royal Society of Chemistry journal article supplement (doi:10.1039/c4ra01626b), 2014-01-01
Supplement: c4ra01626b1.pdf [file c4ra01626b1.pdf]

## Bipolar Resistive Switching Characteristics in LaTiO<sub>3</sub> Nanosheets

Xi Lin<sup>#</sup>, Adnan Younis<sup>#</sup>, Xinrun Xiong, Kejun Dong, Dewei Chu<sup>\*#</sup> and Sean Li

*School of Materials Science and Engineering, University of New South Wales, Sydney, 2052,  
NSW, Australia*

### Supporting Information

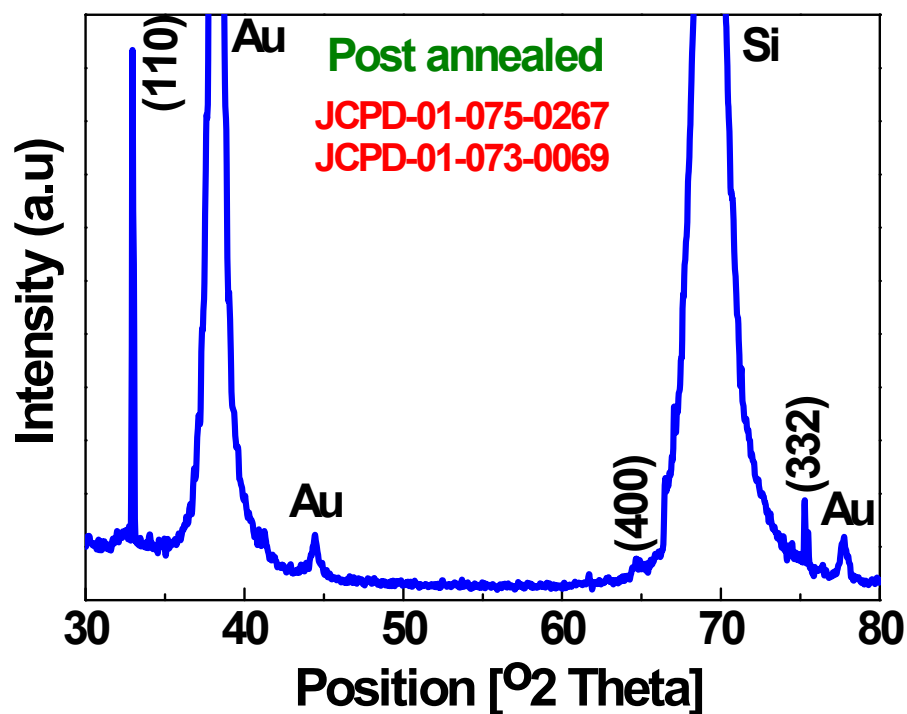

**Figure S1:** XRD pattern of LTO nanosheets films after thermal treatment for overnight.

\*Tel.: +61 (0)2 9385 5386; Fax: +61 (0)2 9385 6565

E-mail: d.chu@unsw.edu.au

<sup>#</sup> Authors have equal contribution

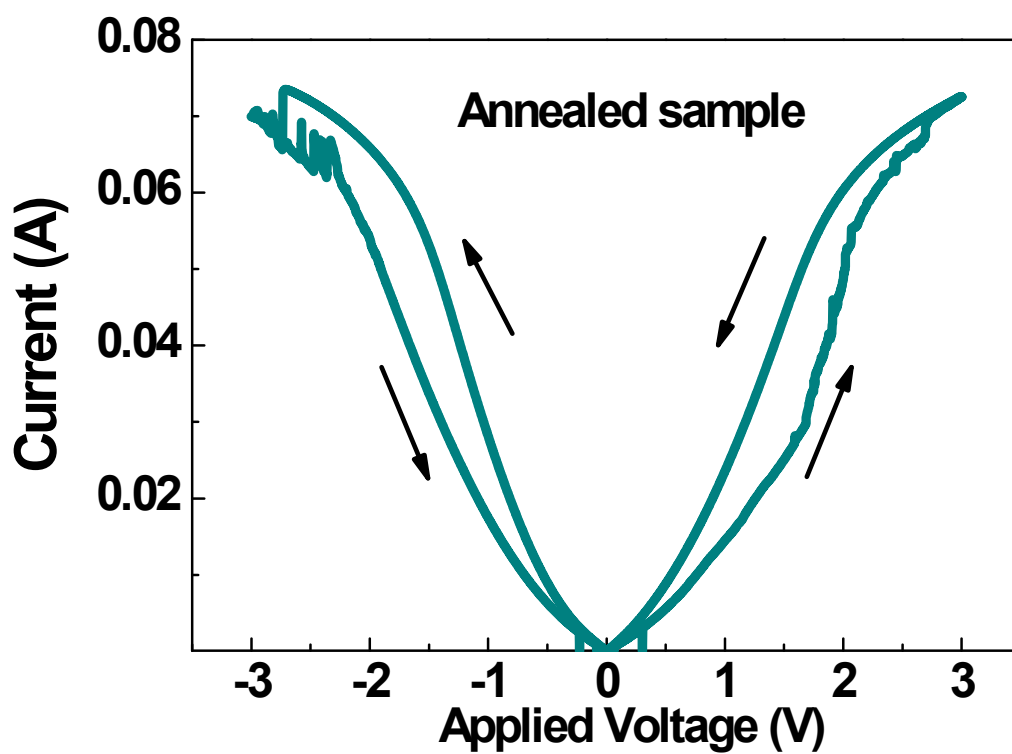

Figure S2: IV curves of LTO nanosheets films after thermal treatment for overnight.

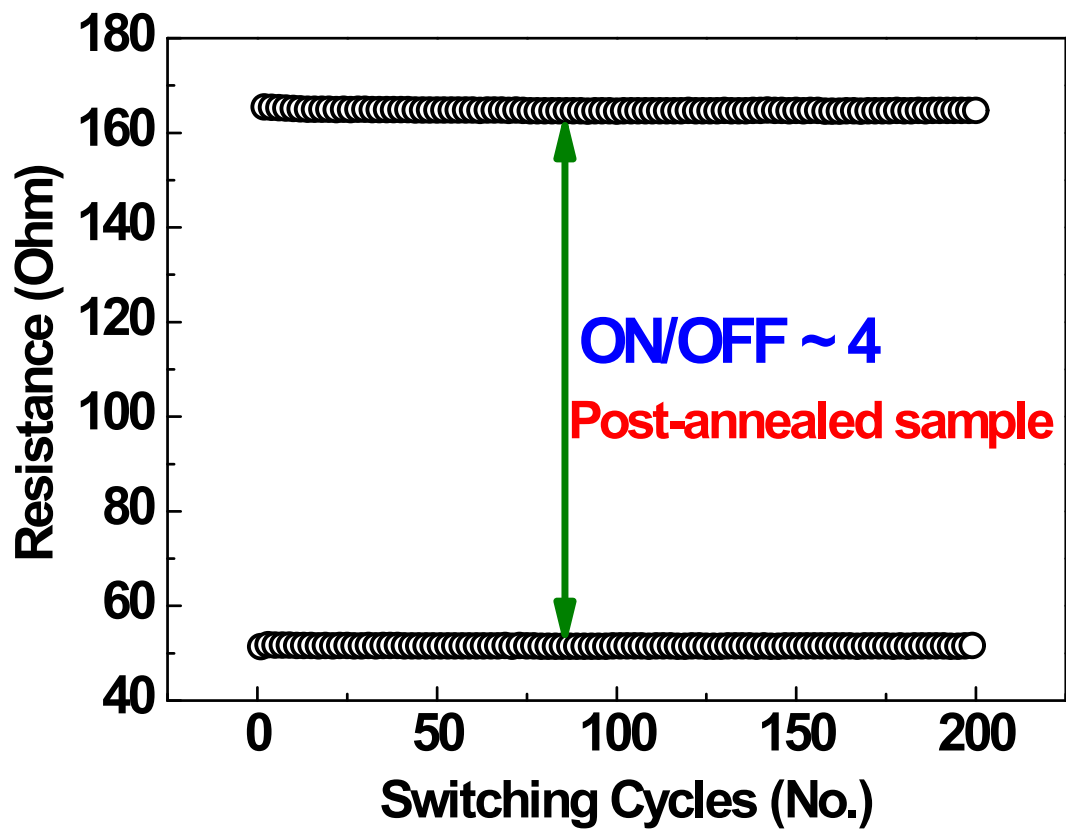

Figure S3: Endurance cycle tests of post annealed LTO nanosheets films for 200 cycles.
